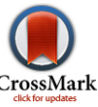

## Correction

# Correction: A Continuous-Exchange Cell-Free Protein Synthesis System Based on Extracts from Cultured Insect Cells

The *PLOS ONE* Staff

## Notice of Republication

This article was republished on May 21, 2014, to correct a typesetting error in the author byline and citation. The publisher apologizes for the error. Please download this article again to view the correct version. The originally published, uncorrected article and the republished, corrected article are provided here for reference.

## Supporting Information

**File S1.** Originally published, uncorrected article.

**File S2.** Republished, corrected article.

## Reference

1. Stech M, Quast RB, Sachse R, Schulze C, Wüstenhagen DA, et al. (2014) A Continuous-Exchange Cell-Free Protein Synthesis System Based on Extracts from Cultured Insect Cells. *PLoS ONE* 9(5): e96635. doi:10.1371/journal.pone.0096635

**Citation:** The *PLOS ONE* Staff (2014) Correction: A Continuous-Exchange Cell-Free Protein Synthesis System Based on Extracts from Cultured Insect Cells. *PLoS ONE* 9(6): e100344. doi:10.1371/journal.pone.0100344

**Published:** June 17, 2014

**Copyright:** © 2014 The *PLOS ONE* Staff. This is an open-access article distributed under the terms of the Creative Commons Attribution License, which permits unrestricted use, distribution, and reproduction in any medium, provided the original author and source are credited.
